# Supplementary material for: A translational mouse model for investigation of the mechanism of preterm diffuse white matter injury
Source: PubMed Central journal article supplement — Transl Pediatr. 2022 Jul;11(7):1074–84. doi: 10.21037/tp-22-58 (PMC9360811; doi:10.21037/tp-22-58), 2022-07
Supplement: tp-11-07-1074-dss.pdf [file tp-11-07-1074-dss.pdf]

## Data Sharing Statement

|                     |                                                                                                                                                    |                                                                                                                                      |
|---------------------|----------------------------------------------------------------------------------------------------------------------------------------------------|--------------------------------------------------------------------------------------------------------------------------------------|
| <b>Article Info</b> | <a href="https://dx.doi.org/10.21037/tp-22-58">https://dx.doi.org/10.21037/tp-22-58</a>                                                            |                                                                                                                                      |
| <b>Item</b>         | <b>Question</b>                                                                                                                                    | <b>Authors' Response<br/>(place "-" if not applicable)</b>                                                                           |
| 1                   | Would you like to share data collected for your study to others?                                                                                   | Yes                                                                                                                                  |
| 2                   | If not, would you like to share the reason for your decision?                                                                                      | -                                                                                                                                    |
| 3                   | What data in particular will be shared?                                                                                                            | We would like to share all raw data related to this article.                                                                         |
| 4                   | Any other documents will be share? Such as study protocol, statistical analysis plan, informed consent form, clinical study report, analytic code. | Study protocol                                                                                                                       |
| 5                   | When will data availability begin?                                                                                                                 | From the publication date.                                                                                                           |
| 6                   | When will data availability end?                                                                                                                   | Two years within the publication date.                                                                                               |
| 7                   | To whom will you share the data?                                                                                                                   | All the people interested in perinatal white matter injury.                                                                          |
| 8                   | For what type of analysis or purpose?                                                                                                              | For investigating the method to reduce perinatal white matter injury.                                                                |
| 9                   | How or where can the data/documents be obtained?                                                                                                   | Please send me a mail to obtain the shared data. My mail address is <a href="mailto:chaochen@fudan.edu.cn">chaochen@fudan.edu.cn</a> |
| 10                  | Any other restrictions?                                                                                                                            | We may balance the potential benefits and risks for each request and then provide the data that could be shared.                     |
